# Supplementary material
Source: MDPI journal article supplement (https://www.mdpi.com/2311-7524/9/6/704)

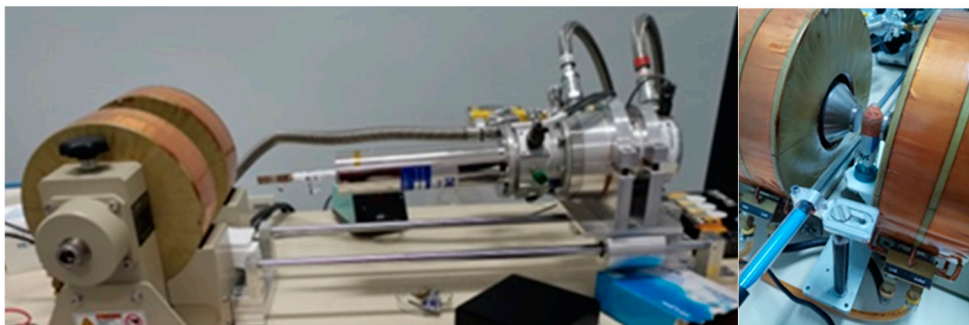

Figure S1. Hall Effect equipment (HEMS).

Supplement: s1 [file s1]
